# Supplementary material
Source: publisher site journal article supplement (https://www.dovepress.com/article/575552)
Supplement: Supplementary file 1 [file 575552%20Revised%20Supplementary%20Materials.docx]

**
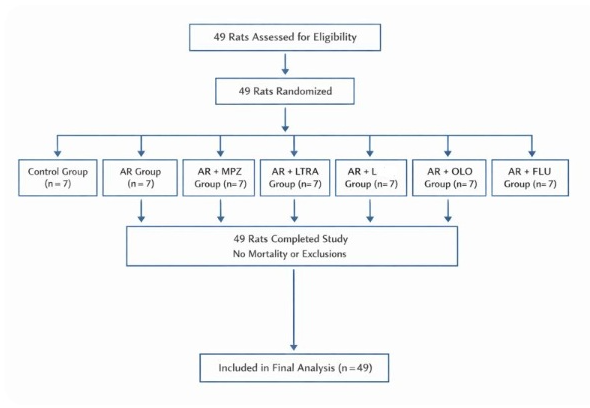
**

**Supplementary Figure S1:** **CONSORT diagram of animal assignment**

**
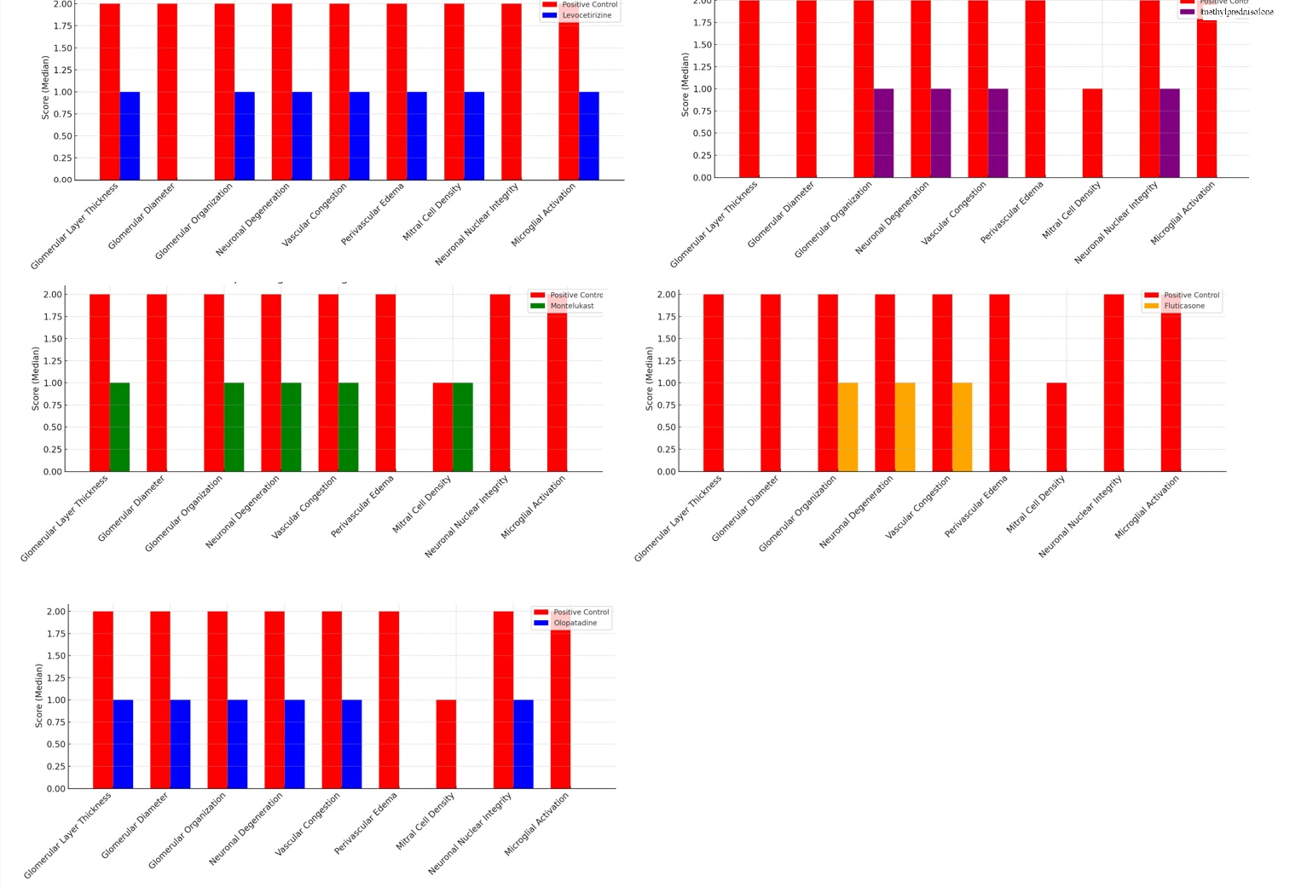
**

**Supplementary Figure S2:** Histopathological changes in the olfactory bulb following treatment in experimental allergic rhinitis

**
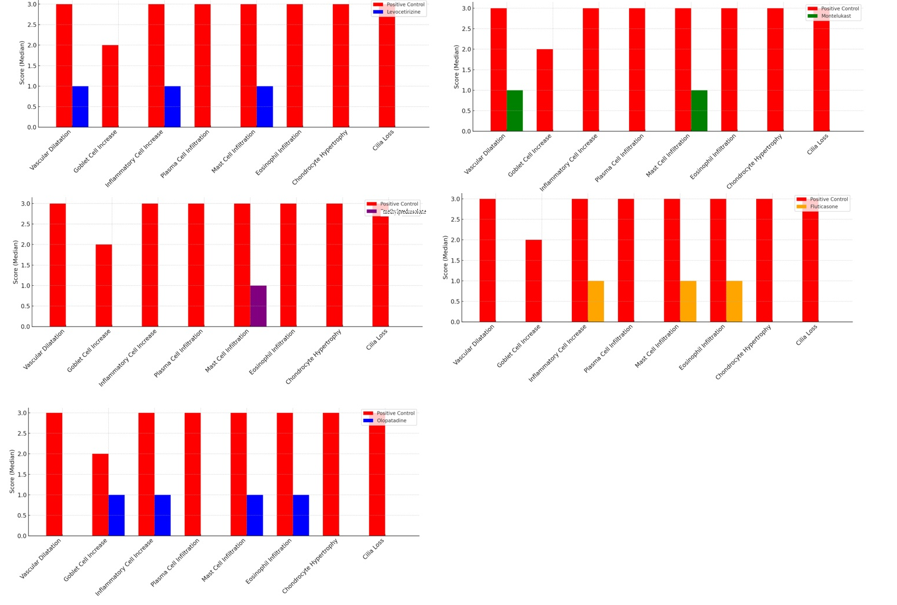
**

**Supplementary Figure S3:** Histopathological changes in the mucosal epitelhium following treatment in experimental allergic rhinitis

**
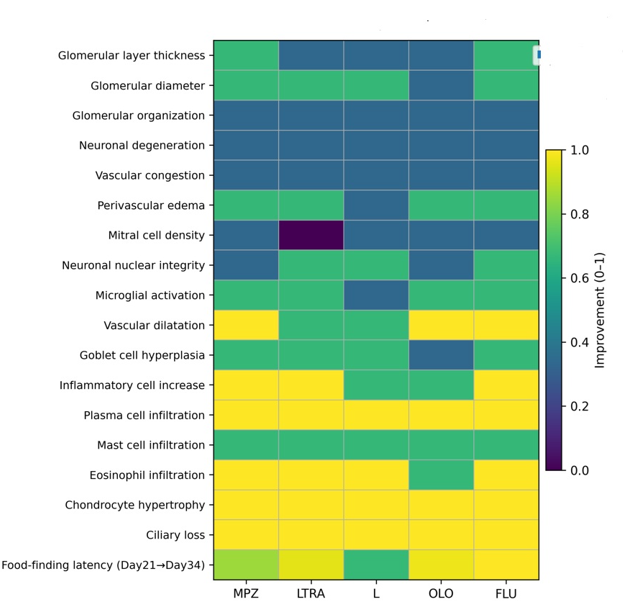
**

**Supplementary Figure S4. Heatmap of normalized histopathological and functional improvement across treatment groups**

**
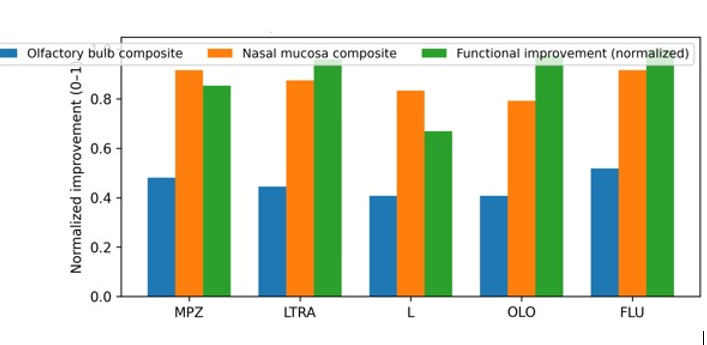
**

**Supplementary Figure S5:** **Composite improvement scores for olfactory bulb, nasal mucosa, and olfactory function**

**Supplementary Table S1. Comparison of glomerular and nasal mucosal histopathology between the positive control and methylprednisolone-treated** **groups**

| **Parameter, median (min -max)** | |  | | --- |  | **AR group**  **(n=7)** | | --- | | |  | | --- |  | **AR + MPZ group (n=7)** | | --- | | **p value** |
| --- | --- | --- | --- | --- | --- | --- | --- |
| **Glomerular layer thickness†** | 2.0 (1.0–3.0) | 0.0 (0.0–1.0) | **0.001** |
| **Glomerular diameter†** | 2.0 (1.0–3.0) | 0.0 (0.0–1.0) | **0.001** |
| **Glomerular organization†** | 2.0 (2.0–3.0) | 1.0 (0.0–1.0) | **<0.001** |
| **Neuronal degeneration†** | 2.0 (2.0–2.0) | 1.0 (0.0–2.0) | **0.004** |
| **Vascular congestion†** | 2.0 (1.0–3.0) | 1.0 (0.0–1.0) | **0.002** |
| **Perivascular edema†** | 2.0 (2.0–3.0) | 0.0 (0.0–1.0) | **<0.001** |
| **Mitral cell density†** | 1.0 (1.0–2.0) | 0.0 (0.0–1.0) | **0.002** |
| **Neuronal nuclear integrity†** | 2.0 (1.0–2.0) | 1.0 (0.0–2.0) | 0.053 |
| **Microglial activation†** | 2.0 (1.0–2.0) | 0.0 (0.0–1.0) | **0.002** |
| **Vascular dilatation*** | 3.0 (1.0–3.0) | 0.0 (0.0–1.0) | **0.001** |
| **Goblet cell hyperplasia*** | 2.0 (1.0–3.0) | 0.0 (0.0–1.0) | **0.001** |
| **Inflammatory cell increase*** | 3.0 (2.0–3.0) | 0.0 (0.0–2.0) | **0.001** |
| **Plasma cell infiltration*** | 3.0 (2.0–3.0) | 0.0 (0.0–0.2) | **<0.001** |
| **Mast cell infiltration*** | 3.0 (2.0–3.0) | 1.0 (0.0–1.0) | **<0.001** |
| **Eosinophil infiltration*** | 3.0 (1.0–3.0) | 0.0 (0.0–1.0) | **0.001** |
| **Chondrocyte hypertrophy*** | 3.0 (1.0–3.0) | 0.0 (0.0–0.0) | **<0.001** |
| **Ciliary loss*** | 3.0 (1.0–3.0) | 0.0 (0.0–1.0) | **0.001** |

**Min–max:** Minimum–maximum; **AR group:** Positive control group; **AR + MPZ group:** systemic methylprednisolone-treated group, **†** glomerular histopathology findings**; *** nasal mucosal histopathologyfindings

**Supplementary Table S2. Comparison of glomerular and nasal mucosal histopathology between the positive control and Leukotriene receptor antagonist treated groups**

| **Parameter, median (min -max)** | |  | | --- |  | **AR group**  **(n=7)** | | --- | | |  | | --- |  | **AR + LTRA group (n=7)** | | --- | | **p value** |
| --- | --- | --- | --- | --- | --- | --- | --- |
| **Glomerular layer thickness†** | 2.0 (1.0–3.0) | 1.0 (0.0–2.0) | **0.007** |
| **Glomerular diameter†** | 2.0 (1.0–3.0) | 0.0 (0.0–2.0) | **0.007** |
| **Glomerular organization†** | 2.0 (2.0–3.0) | 1.0 (0.0–2.0) | **0.004** |
| **Neuronal degeneration†** | 2.0 (2.0–2.0) | 1.0 (0.0–2.0) | **0.026** |
| **Vascular congestion†** | 2.0 (1.0–3.0) | 1.0 (0.0–2.0) | **0.007** |
| **Perivascular edema†** | 2.0 (2.0–3.0) | 0.0 (0.0–2.0) | **0.004** |
| **Mitral cell density†** | 1.0 (1.0–2.0) | 1.0 (0.0–2.0) | 0.383 |
| **Neuronal nuclear integrity†** | 2.0 (1.0–2.0) | 0.0 (0.0–1.0) | **0.007** |
| **Microglial activation†** | 2.0 (1.0–2.0) | 0.0 (0.0–1.0) | **0.002** |
| **Vascular dilatation*** | 3.0 (1.0–3.0) | 1.0 (0.0–2.0) | **0.011** |
| **Goblet cell hyperplasia*** | 2.0 (1.0–3.0) | 0.0 (0.0–2.0) | **0.004** |
| **Inflammatory cell increase*** | 3.0 (2.0–3.0) | 0.0 (0.0–2.0) | **<0.001** |
| **Plasma cell infiltration*** | 3.0 (2.0–3.0) | 0.0 (0.0–0.0) | **<0.001** |
| **Mast cell infiltration*** | 3.0 (2.0–3.0) | 1.0 (0.0–1.0) | **<0.001** |
| **Eosinophil infiltration*** | 3.0 (1.0–3.0) | 0.0 (0.0–2.0) | **0.001** |
| **Chondrocyte hypertrophy*** | 3.0 (1.0–3.0) | 0.0 (0.0–1.0) | **<0.001** |
| **Ciliary loss*** | 3.0 (1.0–3.0) | 0.0 (0.0–1.0) | **0.001** |

**Min–max:** Minimum–maximum; **AR group:** Positive control group; **AR + LTRA group:** Leukotriene receptor antagonist treated group; **†** glomerular histopathology findings**; *** nasal mucosal histopathologyfindings

**Supplementary Table S3. Comparison of glomerular and nasal mucosal histopathology between the positive control and levocetirizine groups**

| **Parameter, median (min -max)** | |  | | --- |  | **AR group**  **(n=7)** | | --- | | |  | | --- |  | **AR + L group (n=7)** | | --- | | **p value** |
| --- | --- | --- | --- | --- | --- | --- | --- |
| **Glomerular layer thickness†** | 2.0 (1.0–3.0) | 1.0 (0.0–2.0) | **0.007** |
| **Glomerular diameter†** | 2.0 (1.0–3.0) | 0.0 (0.0–1.0) | **0.001** |
| **Glomerular organization†** | 2.0 (2.0–3.0) | 1.0 (0.0–2.0) | **0.008** |
| **Neuronal degeneration†** | 2.0 (2.0–2.0) | 1.0 (0.0–1.0) | **<0.001** |
| **Vascular congestion†** | 2.0 (1.0–3.0) | 1.0 (0.0–2.0) | **0.008** |
| **Perivascular edema†** | 2.0 (2.0–3.0) | 1.0 (0.0–2.0) | **0.003** |
| **Mitral cell density†** | 1.0 (1.0–2.0) | 0.0 (0.0–1.0) | **0.026** |
| **Neuronal nuclear integrity†** | 2.0 (1.0–2.0) | 0.0 (0.0–1.0) | **0.004** |
| **Microglial activation†** | 2.0 (1.0–2.0) | 1.0 (0.0–1.0) | **0.011** |
| **Vascular dilatation*** | 3.0 (1.0–3.0) | 1.0 (0.0–2.0) | **0.007** |
| **Goblet cell hyperplasia*** | 2.0 (1.0–3.0) | 0.0 (0.0–1.0) | **<0.001** |
| **Inflammatory cell increase*** | 3.0 (2.0–3.0) | 1.0 (0.0–1.0) | **<0.001** |
| **Plasma cell infiltration*** | 3.0 (2.0–3.0) | 0.0 (0.0–1.0) | **<0.001** |
| **Mast cell infiltration*** | 3.0 (2.0–3.0) | 1.0 (0.0–1.0) | **<0.001** |
| **Eosinophil infiltration*** | 3.0 (1.0–3.0) | 0.0 (0.0–1.0) | **0.001** |
| **Chondrocyte hypertrophy*** | 3.0 (1.0–3.0) | 0.0 (0.0–1.0) | **<0.001** |
| **Ciliary loss*** | 3.0 (1.0–3.0) | 0.0 (0.0–1.0) | **0.001** |

**Min–max:** Minimum–maximum; **AR group:** Positive control group; **AR + L group:** levocetirizine treated group; **†** glomerular histopathology findings**; *** nasal mucosal histopathologyfindings

**Supplementary Table S4. Comparison of glomerular and nasal mucosal histopathology between the positive control and topical antihistamine treated groups**

| **Parameter, median (min -max)** | |  | | --- |  | **AR group**  **(n=7)** | | --- | | |  | | --- |  | **AR + OLO group (n=7)** | | --- | | **p value** |
| --- | --- | --- | --- | --- | --- | --- | --- |
| **Glomerular layer thickness†** | 2.0 (1.0–3.0) | 1.0 (0.0–2.0) | **0.007** |
| **Glomerular diameter†** | 2.0 (1.0–3.0) | 1.0 (0.0–2.0) | **0.011** |
| **Glomerular organization†** | 2.0 (2.0–3.0) | 1.0 (0.0–2.0) | 0.053 |
| **Neuronal degeneration†** | 2.0 (2.0–2.0) | 1.0 (0.0–2.0) | **0.004** |
| **Vascular congestion†** | 2.0 (1.0–3.0) | 1.0 (1.0–2.0) | **0.011** |
| **Perivascular edema†** | 2.0 (2.0–3.0) | 0.0 (0.0–2.0) | **0.017** |
| **Mitral cell density†** | 1.0 (1.0–2.0) | 0.0 (0.0–1.0) | **0.011** |
| **Neuronal nuclear integrity†** | 2.0 (1.0–2.0) | 1.0 (0.0–2.0) | 0.165 |
| **Microglial activation†** | 2.0 (1.0–2.0) | 0.0 (0.0–1.0) | **0.002** |
| **Vascular dilatation*** | 3.0 (1.0–3.0) | 0.0 (0.0–2.0) | **0.001** |
| **Goblet cell hyperplasia*** | 2.0 (1.0–3.0) | 1.0 (0.0–1.0) | **0.001** |
| **Inflammatory cell increase*** | 3.0 (2.0–3.0) | 1.0 (0.0–2.0) | **0.001** |
| **Plasma cell infiltration*** | 3.0 (2.0–3.0) | 0.0 (0.0–0.2) | **<0.001** |
| **Mast cell infiltration*** | 3.0 (2.0–3.0) | 1.0 (0.0–2.0) | **<0.001** |
| **Eosinophil infiltration*** | 3.0 (1.0–3.0) | 1.0 (0.0–2.0) | **0.001** |
| **Chondrocyte hypertrophy*** | 3.0 (1.0–3.0) | 0.0 (0.0–1.0) | **<0.001** |
| **Ciliary loss*** | 3.0 (1.0–3.0) | 0.0 (0.0–2.0) | **0.001** |

**Min–max:** Minimum–maximum; **AR group:** Positive control group; **AR + OLO group:** Topical antihistamine treated group; **†** glomerular histopathology findings**; *** nasal mucosal histopathologyfindings

**Supplementary Table S5. Comparison of glomerular and nasal mucosal histopathology between the positive control and topical steroid treated groups**

| **Parameter, median (min -max)** | |  | | --- |  | **AR group**  **(n=7)** | | --- | | |  | | --- |  | **AR + FLU group (n=7)** | | --- | | **p value** |
| --- | --- | --- | --- | --- | --- | --- | --- |
| **Glomerular layer thickness†** | 2.0 (1.0–3.0) | 0.0 (0.0–2.0) | **0.004** |
| **Glomerular diameter†** | 2.0 (1.0–3.0) | 0.0 (0.0–2.0) | **0.007** |
| **Glomerular organization†** | 2.0 (2.0–3.0) | 1.0 (0.0–3.0) | 0.053 |
| **Neuronal degeneration†** | 2.0 (2.0–2.0) | 1.0 (0.0–2.0) | 0.073 |
| **Vascular congestion†** | 2.0 (1.0–3.0) | 1.0 (1.0–3.0) | 0.128 |
| **Perivascular edema†** | 2.0 (2.0–3.0) | 0.0 (0.0–3.0) | **0.017** |
| **Mitral cell density†** | 1.0 (1.0–2.0) | 0.0 (0.0–0.0) | **<0.001** |
| **Neuronal nuclear integrity†** | 2.0 (1.0–2.0) | 0.0 (0.0–3.0) | 0.165 |
| **Microglial activation†** | 2.0 (1.0–2.0) | 0.0 (0.0–1.0) | **0.001** |
| **Vascular dilatation*** | 3.0 (1.0–3.0) | 0.0 (0.0–2.0) | **0.001** |
| **Goblet cell hyperplasia*** | 2.0 (1.0–3.0) | 0.0 (0.0–2.0) | **0.001** |
| **Inflammatory cell increase*** | 3.0 (2.0–3.0) | 1.0 (0.0–2.0) | **0.001** |
| **Plasma cell infiltration*** | 3.0 (2.0–3.0) | 0.0 (0.0–0.2) | **<0.001** |
| **Mast cell infiltration*** | 3.0 (2.0–3.0) | 1.0 (0.0–2.0) | **<0.001** |
| **Eosinophil infiltration*** | 3.0 (1.0–3.0) | 1.0 (0.0–2.0) | **0.001** |
| **Chondrocyte hypertrophy*** | 3.0 (1.0–3.0) | 0.0 (0.0–1.0) | **<0.001** |
| **Ciliary loss*** | 3.0 (1.0–3.0) | 0.0 (0.0–1.0) | **0.001** |

**Min–max:** Minimum–maximum; **AR group:** Positive control group; **AR + FLU group:** Topical steroid treated group; **†** glomerular histopathology findings**; *** nasal mucosal histopathologyfindings

**Supplementary Table S6: Spearman correlation analysis between olfactory performance and histopathological parameters**

| **Histopathological parameter** | **Day 1 (ρ)** | **p value** | **Day 21 (ρ)** | **p value** | **Day 28 (ρ)** | **p value** | **Day 34 (ρ)** | **p value** |
| --- | --- | --- | --- | --- | --- | --- | --- | --- |
| Glomerular layer thickness | −0.061 | 0.729 | −0.030 | 0.862 | 0.104 | 0.554 | −0.011 | 0.949 |
| Glomerular diameter | 0.097 | 0.577 | 0.166 | 0.341 | 0.073 | 0.677 | −0.044 | 0.801 |
| Glomerular organization | −0.120 | 0.493 | −0.060 | 0.733 | −0.069 | 0.695 | 0.102 | 0.562 |
| Neuronal degeneration | −0.096 | 0.583 | 0.086 | 0.622 | −0.073 | 0.677 | 0.048 | 0.785 |
| Vascular congestion | −0.234 | 0.175 | −0.002 | 0.990 | −0.165 | 0.342 | −0.286 | 0.096 |
| Perivascular edema | −0.036 | 0.838 | −0.094 | 0.590 | −0.070 | 0.691 | 0.091 | 0.603 |
| Mitral cell density | −0.079 | 0.653 | −0.087 | 0.621 | −0.026 | 0.883 | −0.042 | 0.809 |
| Neuronal nuclear integrity | 0.088 | 0.615 | 0.275 | 0.110 | −0.072 | 0.679 | 0.088 | 0.615 |
| Microglial activation | −0.137 | 0.432 | −0.131 | 0.453 | −0.173 | 0.321 | 0.075 | 0.671 |
| Vascular dilatation | −0.105 | 0.549 | −0.081 | 0.644 | 0.279 | 0.105 | 0.145 | 0.407 |
| Goblet cell hyperplasia | −0.048 | 0.784 | 0.182 | 0.296 | **−0.385*** | **0.023** | 0.025 | 0.884 |
| Inflammatory cell infiltration | **−0.359*** | **0.034** | −0.245 | 0.156 | 0.104 | 0.553 | −0.012 | 0.944 |
| Plasma cell infiltration | −0.218 | 0.208 | 0.060 | 0.732 | −0.115 | 0.510 | −0.180 | 0.301 |
| Mast cell infiltration | −0.210 | 0.226 | 0.008 | 0.965 | 0.089 | 0.610 | 0.145 | 0.406 |
| Eosinophil infiltration | −0.181 | 0.298 | 0.051 | 0.773 | 0.184 | 0.290 | 0.133 | 0.445 |
| Chondrocyte hypertrophy | −0.105 | 0.548 | −0.121 | 0.488 | 0.008 | 0.963 | −0.178 | 0.307 |
| Ciliary loss | −0.299 | 0.081 | −0.235 | 0.174 | 0.063 | 0.718 | −0.031 | 0.858 |

ρ, Spearman’s correlation coefficient

* p < 0.05 (two-tailed)
